# Supplementary material
Source: Springer Nature journal article supplement (https://www.springermedizin.de/resource/supplementary/12888_2012_1135_MOESM4_ESM.pdf/9479100)
Supplement: MOESM4 [file 9479100]

**Table 1. Characteristics of respondents meeting DSM-IV MDE criteria (n=915) and of clinics where they sought care (n=65) in the Dialogue Project in 2008**

| <b>Characteristics of respondents</b>                                   |             |
|-------------------------------------------------------------------------|-------------|
| <b>Predisposing factors</b>                                             |             |
| Age (mean (sd))                                                         | 43.8 (13.9) |
| Sex                                                                     |             |
| Female                                                                  | 75 %        |
| Male                                                                    | 25 %        |
| Education level                                                         |             |
| High school or less                                                     | 45 %        |
| College                                                                 | 29 %        |
| University                                                              | 26 %        |
| Marital status                                                          |             |
| Married / living common-law                                             | 51 %        |
| Widowed / separated / divorced                                          | 22 %        |
| Single                                                                  | 28 %        |
| <b>Enabling factors</b>                                                 |             |
| Perception of Economic Situation                                        |             |
| Poor or Very Poor                                                       | 30 %        |
| Well off / meet basic needs                                             | 70 %        |
| Have a family physician                                                 |             |
| Yes                                                                     | 83 %        |
| No                                                                      | 17 %        |
| Have a supplementary insurance coverage                                 |             |
| Yes                                                                     | 58 %        |
| No                                                                      | 42 %        |
| <b>Need factors</b>                                                     |             |
| Severity of depressive symptoms (HADS depression sub-scale (mean (sd))) | 7.7 (4.4)   |
| At least one comorbid Anxiety Disorder (GAD, Agoraphobia, SP, PD)       |             |
| Yes                                                                     | 55 %        |
| No                                                                      | 45 %        |
| Perceived Mental Health as                                              |             |
| Poor or Moderate                                                        | 43 %        |
| Good or Very Good or Excellent                                          | 57 %        |
| Depression Episode                                                      |             |
| in Previous 6 months                                                    | 75 %        |
| Between 6 and 12 months ago                                             | 25 %        |
| First Occurrence of Symptoms                                            |             |
| > 5 years                                                               | 70 %        |
| ≤ 5 years                                                               | 30 %        |
| Comorbid Chronic Illnesses                                              |             |

|           |      |
|-----------|------|
| 0         | 22 % |
| 1         | 23 % |
| 2         | 20 % |
| 3 or more | 35 % |

---

**Characteristics of clinics**

---

|                                                                                                                                 |      |
|---------------------------------------------------------------------------------------------------------------------------------|------|
| Psychotherapy available on-site                                                                                                 |      |
| Yes                                                                                                                             | 62 % |
| No                                                                                                                              | 38 % |
| Presence of a case manager for patients suffering from anxiety or depressive disorders                                          |      |
| Yes                                                                                                                             | 46 % |
| No                                                                                                                              | 54 % |
| Number of GP using treatment algorithms with individuals suffering from anxiety or depressive disorders                         |      |
| None/Some                                                                                                                       | 68 % |
| All/Most                                                                                                                        | 32 % |
| Inadequate mode of remuneration to offer an “optimal level” of care for patients suffering from anxiety or depressive disorders |      |
| Not at all / Slightly                                                                                                           | 14 % |
| Fairly                                                                                                                          | 31 % |
| Highly                                                                                                                          | 35 % |
| Lack of time for follow-up to offer an “optimal level” of care for patients suffering from anxiety or depressive disorders      |      |
| Not at all / Slightly                                                                                                           | 14 % |
| Fairly                                                                                                                          | 46 % |
| Highly                                                                                                                          | 40 % |

---
